# Supplementary material for: Genotypic Characterization of Pseudomonas aeruginosa Isolates from Eyes with Keratitis and Healthy Conjunctival Sacs
Source: Research Square preprint supplement (doi:10.21203/rs.3.rs-951375/v1), 2021-10-13
Supplement: Supplementary file 1 [file a63689235c93d386f1ecebe8.docx]

**Supplementary Table 1:** **Nucleotide sequence of the specific primers used for PCR amplification.**

| **Number** | **Gene function** | **Forward primer (5’-3’)** | **Reverse primer (5’-3’)** |
| --- | --- | --- | --- |
| Q010_05497 | Housekeeping gene 16s rRNA | ACG CTT TCG CAC CTC AGT GT | CCT GGG AAC TGC ATC CAA AA |
| Q010_02099 | Acyl-homoserine lactone acylase *Pvd*Q | GAC GCT CGA GGA AAT GGT CA | AAG TAG ACG AAG CCA CTG CC |
| Q010_02058 | Pyoverdine non-ribosomal peptide synthase/polyketide synthase *Pvd*L | GCA TGA TCC GCA GGT CTA CA | GAT CAC GTC GTT CTC GTC CA |
| Q010_06256 | Type II secretion system protein *Gsp*H | CGC GCC AGT ACC GAG CCA G | CGT CGT CCAG CAC AGC CAC |
| Q010_06248 | Type II secretion system protein *Gsp*E | CGC CTG ATG GAC GAT ATC CC | CAC CGA ATG GGT CTC GAA GG |
| Q010_03784 | Type 4b pilus Flp major pilin | CCC TGT TCG TGT ATT GCA AAG TT | CTT TCA GAC CGC CGA CGA TA |
| Q010_01891 | Type 1 fimbrial protein | GAG TGG GAA AGG GAG AAA CCA | TGC ATG TAG TGA AGA AGG CAT TG |
| Q010_02816 | Translocation protein in type III secretion | CCT GGC AGC AGC AGG TAG G | AGG TAG AAC GCA CGG TTG TAC A |
| Q010_02805 | CesD/SycD/LcrH family type III secretion system chaperone | GCA CCC TGG CGA TGC TT | AGA AAG TAG CGG GCG TCG TA |
| Q010_02806 | Type III secretion protein | AGG ACA GCC CCG AGT ATG C | GAC CGG GTT GTT GTC CTT CTC |
| Q010_03570 | Type III secretion system effector cytotoxin *Exo*U | TTG CCG AGA ACA TTC GTA AGG | CGA TAT CGT TCA GCG CTT GA |
| Q010_02802 | *Exo*S synthesis protein C | AGC GCG AGC GTC TGT TG | AGC GCG AGC GTC TGT TG |

Gene Q010_02099 and Gene Q010_02058 were participated in iron metabolic process. Gene Q010_06256, Gene Q010_06248, Gene Q010_03784 and Gene Q010_01891 were involved with Type 2 Secretion Systerm. Gene Q010_02816, Gene Q010_02805, Gene Q010_02806, Gene Q010_03570 and Gene Q010_02802 were involved with Type 3 Secretion Systerm. 16s rRNA was used as an internal control for *P. aeruginosa*.
